# Supplementary material for: Expression analysis of Argonaute genes in maize (Zea mays L.) in response to abiotic stress
Source: Hereditas. 2019 Jul 24;156:27. doi: 10.1186/s41065-019-0102-z (PMC6651970; doi:10.1186/s41065-019-0102-z)
Supplement: Supplementary file 1 — Table S1. Putative cis-elements of more than 5 bp identified in 17 ZmAGO genes using PlantCARE database. (XLSX 64 kb) [file 41065_2019_102_MOESM1_ESM.xlsx]

## Sheet: Table S1
Table S1. Putative cis-elements of more than 5 bp identified in 17 ZmAGO genes using PlantCARE database
Gene name	Cis element	Related organism	Genome Co-ordination				Promoter Sequence	Function
			Chromosome(Start-end)	Position	Matrix score	Strand
ZmAGO1a	MYB-like sequence	Arabidopsis thaliana	chr6:43094032…43092532	64	6	+	TAACCA
	CGTCA-motif	Hordeum vulgare		140	5	-	CGTCA	cis-acting regulatory element involved in the MeJA-responsiveness
	CGTCA-motif	Hordeum vulgare		433	5	+	CGTCA	cis-acting regulatory element involved in the MeJA-responsiveness
	CGTCA-motif	Hordeum vulgare		1426	5	+	CGTCA	cis-acting regulatory element involved in the MeJA-responsiveness
	CCGTCC-box	Petroselinum hortense		407	6	-	CCGTCC	Meristem specific activation
	CCGTCC-box	Petroselinum hortense		467	6	-	CCGTCC	Meristem specific activation
	as-1	Arabidopsis thaliana		140	5	+	TGACG	cis-acting regulatory element involved in the MeJA-responsiveness
	as-1	Arabidopsis thaliana		433	5	-	TGACG	cis-acting regulatory element involved in the MeJA-responsiveness
	as-1	Arabidopsis thaliana		1426	5	-	TGACG	cis-acting regulatory element involved in the MeJA-responsiveness
	A-box	Petroselinum crispum		407	6	-	CCGTCC	cis-acting regulatory element
	A-box	Petroselinum crispum		467	6	-	CCGTCC	cis-acting regulatory element
	AAGAA-motif	Avena sativa		557	7	-	GAAAGAA
	TCA	Pisum sativum		1026	10	+	TCATCTTCAT
	P-box	Oryza sativa		1261	7	-	CCTTTTG	gibberellin-responsive element
	Box 4	Petroselinum crispum		276	6	+	ATTAAT	part of a conserved DNA module involved in light responsiveness
	TGACG-motif	Hordeum vulgare		140	5	+	TGACG	cis-acting regulatory element involved in the MeJA-responsiveness
	TGACG-motif	Hordeum vulgare		433	5	-	TGACG	cis-acting regulatory element involved in the MeJA-responsiveness
	TGACG-motif	Hordeum vulgare		1426	5	-	TGACG	cis-acting regulatory element involved in the MeJA-responsiveness
	MYC	Arabidopsis thaliana		302	6	-	CATTTG
	MYC	Arabidopsis thaliana		958	6	+	CATTTG
	MYC	Arabidopsis thaliana		984	6	+	CATTTG
	WUN-motif	Nicotiana glutinosa		399	9	-	CCATTTCAA	Wound-responsive
	ABRE3a	Zea mays		942	6	+	TACGTG
	STRE	Arabidopsis thaliana		586	5	+	AGGGG	Stress Response Element
	Myb	Arabidopsis thaliana		396	6	-	CAACTG
	GATA-motif	Solanum tuberosum		571	9	-	AAGGATAAGG	part of a light responsive element
	GATA-motif	Solanum tuberosum		1264	9	+	AAGGATAAGG	part of a light responsive element
	G-box	Zea mays		89	6	+	CACGAC	cis-acting regulatory element involved in light responsiveness
	G-box	Arabidopsis thaliana		942	6	+	TACGTG	cis-acting regulatory element involved in light responsiveness
	GT1-motif	Arabidopsis thaliana		1266	6	+	GGTTAA	light responsive element
	ARE	Zea mays		1372	6	+	AAACCA	cis-acting regulatory element essential for the anaerobic induction
	MYB	Arabidopsis thaliana		1045	6	-	CAACCA
	MYB	Arabidopsis thaliana		1113	6	-	CAACAG
	LTR	Hordeum vulgare		699	6	+	CCGAAA	cis-acting element involved in low-temperature responsiveness
	ABRE4	Zea mays		942	6	-	CACGTA
	MBS	Arabidopsis thaliana		396	6	-	CAACTG	MYB binding site involved in drought-inducibility
	TCA-element	Nicotiana tabacum		232	9	-	CCATCTTTTT	cis-acting element involved in salicylic acid responsiveness
	TCA-element	Nicotiana tabacum		1099	9	-	CCATCTTTTT	cis-acting element involved in salicylic acid responsiveness
	TGA-element	Brassica oleracea		868	6	-	AACGAC	auxin-responsive element
	Myb-binding site	Nicotiana tabacum		1113	6	-	CAACAG
	ABRE	Arabidopsis thaliana		372	7	+	AACCCGG	cis-acting element involved in the abscisic acid responsiveness
	ABRE	Arabidopsis thaliana		943	5	+	ACGTG	cis-acting element involved in the abscisic acid responsiveness
ZmAGO1b	CGTCA-motif	Hordeum vulgare	chr2:16940363..16938863	4	5	-	CGTCA	cis-acting regulatory element involved in the MeJA-responsiveness
	CGTCA-motif	Hordeum vulgare		7	5	+	CGTCA	cis-acting regulatory element involved in the MeJA-responsiveness
	as-1	Arabidopsis thaliana		4	5	+	TGACG
	as-1	Arabidopsis thaliana		7	5	-	TGACG
	DRE core	Arabidopsis thaliana		305	6	-	GCCGAC
	STRE	Arabidopsis thaliana		315	5	+	AGGGG	Stress Response Element
	STRE	Arabidopsis thaliana		526	5	-	AGGGG
	STRE	Arabidopsis thaliana		540	5	+	AGGGG
	STRE	Arabidopsis thaliana		843	5	+	AGGGG
	STRE	Arabidopsis thaliana		1245	5	+	AGGGG
	GCN4_motif	Oryza sativa		75	7	+	TGAGTCA	cis-regulatory element involved in endosperm expression
	Myb	Arabidopsis thaliana		236	6	-	CAACTG
	TCCC-motif	Spinacia oleracea		1175	7	+	TCTCCCT	part of a light responsive element
	TGACG-motif	Hordeum vulgare		4	5	+	TGACG	cis-acting regulatory element involved in the MeJA-responsiveness
	TGACG-motif	Hordeum vulgare		7	5	-	TGACG	cis-acting regulatory element involved in the MeJA-responsiveness
	G-Box	Pisum sativum		336	6	-	CACGTT	cis-acting regulatory element involved in light responsiveness
	WRE3	Pisum sativum		495	6	-	CCACCT
	WRE3	Pisum sativum		831	6	-	CCACCT
	WRE3	Pisum sativum		1077	6	-	CCACCT
	WRE3	Pisum sativum		1207	6	-	CCACCT
	WRE3	Pisum sativum		1229	6	-	CCACCT
	ARE	Zea mays		1364	6	-	AAACCA	cis-acting regulatory element essential for the anaerobic induction
	MYB	Arabidopsis thaliana		640	6	+	CAACCA
	MYB	Arabidopsis thaliana		1110	6	-	CAACCA
	LTR	Hordeum vulgare		1298	6	-	CCGAAA	cis-acting element involved in low-temperature responsiveness
	MBS	Arabidopsis thaliana		236	6	-	CAACTG	MYB binding site involved in drought-inducibility
	TATC-box	Oryza sativa		193	7	+	TATCCCA	cis-acting element involved in gibberellin-responsiveness
	MYC	Arabidopsis thaliana		125	6	-	CATGTG
	MYC	Arabidopsis thaliana		391	6	+	CATTTG
	TCT-motif	Arabidopsis thaliana		1491	6	-	TCTTAC	part of a light responsive element
	ABRE	Arabidopsis thaliana		337	5	+	ACGTG	cis-acting element involved in the abscisic acid responsiveness
ZmAGO1c	MYB-like sequence	Arabidopsis thaliana	chr10:137481424…137479924	1468	6	-	TAACCA
	CGTCA-motif	Hordeum vulgare		147	5	+	CGTCA	cis-acting regulatory element involved in the MeJA-responsiveness
	CCGTCC-box	Petroselinum hortense		11	6	+	CCGTCC
	CCGTCC-box	Petroselinum hortense		71	6	+	CCGTCC
	CAT-box	Arabidopsis thaliana		511	6	-	GCCACT	cis-acting regulatory element related to meristem expression
	as-1	Arabidopsis thaliana		147	5	-	TGACG
	A-box	Petroselinum crispum		11	6	+	CCGTCC	cis-acting regulatory element
	A-box	Petroselinum crispum		71	6	+	CCGTCC	cis-acting regulatory element
	TCA	Pisum sativum		299	9	-	TCATCTTCAT
	TCA	Pisum sativum		899	9	+	TCATCTTCAT
	P-box	Oryza sativa		1453	7	+	CCTTTTG	gibberellin-responsive element
	Box 4	Petroselinum crispum		617	6	+	ATTAAT	part of a conserved DNA module involved in light responsiveness
	Box 4	Petroselinum crispum		970	6	-	ATTAAT	part of a conserved DNA module involved in light responsiveness
	Box 4	Petroselinum crispum		985	6	-	ATTAAT	part of a conserved DNA module involved in light responsiveness
	Box 4	Petroselinum crispum		995	6	-	ATTAAT	part of a conserved DNA module involved in light responsiveness
	TCCC-motif	Spinacia oleracea		103	7	+	TCTCCCT	part of a light responsive element
	TGACG-motif	Hordeum vulgare		147	5	-	TGACG	cis-acting regulatory element involved in the MeJA-responsiveness
	MYC	Arabidopsis thaliana		498	6	+	CATTTG
	W box	Arabidopsis thaliana		1265	6	-	TTGACC
	Sp1	Oryza sativa		224	6	-	GGGCGG	light responsive element
	AT~TATA-box	Arabidopsis thaliana		1178	6	-	TATATA	Stress Response Element
	STRE	Arabidopsis thaliana		38	5	-	AGGGG	Stress Response Element
	STRE	Arabidopsis thaliana		63	5	-	AGGGG
	STRE	Arabidopsis thaliana		81	5	-	AGGGG
	STRE	Arabidopsis thaliana		97	5	-	AGGGG
	STRE	Arabidopsis thaliana		252	5	-	AGGGG
	STRE	Arabidopsis thaliana		270	5	-	AGGGG
	STRE	Arabidopsis thaliana		1057	5	-	AGGGG
	Myb	Arabidopsis thaliana		922	6	+	TAACTG
	G-Box	Pisum sativum		150	6	+	CACGTG	cis-acting regulatory element involved in light responsiveness
	G-Box	Pisum sativum		639	6	+	CACGTT	cis-acting regulatory element involved in light responsiveness
	G-Box	Pisum sativum		744	6	+	CACGTT	cis-acting regulatory element involved in light responsiveness
	GATA-motif	Solanum tuberosum		1437	9	-	AAGGATAAGG	part of a light responsive element
	G-box	Arabidopsis thaliana		150	6	+	CACGTG	cis-acting regulatory element involved in light responsiveness
	G-box	Zea mays		699	6	+	CACGTC	cis-acting regulatory element involved in light responsiveness
	G-box	Zea mays		750	6	-	CACGAC	cis-acting regulatory element involved in light responsiveness
	G-box	Zea mays		861	6	+	CACGTC	cis-acting regulatory element involved in light responsiveness
	G-box	Zea mays		864	6	-	CACGAC	cis-acting regulatory element involved in light responsiveness
	GT1-motif	Avena sativa		592	7	-	GGTTAAT	light responsive element
	GT1-motif	Arabidopsis thaliana		593	6	-	GGTTAA	light responsive element
	Box II	Sinapis alba		743	9	+	ACACGTTGT	part of a light responsive element
	CCGTCC motif	Nicotiana tabacum		11	6	+	CCGTCC
	CCGTCC motif	Nicotiana tabacum		71	6	+	CCGTCC
	MRE	Petroselinum crispum		1408	7	+	AACCTAA	MYB binding site involved in light responsiveness
	ARE	Zea mays		363	6	-	AAACCA	cis-acting regulatory element essential for the anaerobic induction
	MYB	Arabidopsis thaliana		1468	6	-	TAACCA
	GC-motif	Zea mays		68	6	+	CCCCCG	enhancer-like element involved in anoxic specific inducibility
	GC-motif	Zea mays		227	6	+	CCCCCG	enhancer-like element involved in anoxic specific inducibility
	TGA-element	Brassica oleracea		523	6	+	AACGAC	auxin-responsive element
	TGA-element	Brassica oleracea		712	6	-	AACGAC	auxin-responsive element
	TGA-element	Brassica oleracea		825	6	-	AACGAC	auxin-responsive element
	ABRE	Hordeum vulgare		12	9	+	CGTACGTGCA	cis-acting element involved in the abscisic acid responsiveness
	ABRE	Arabidopsis thaliana		150	6	+	CACGTG	cis-acting element involved in the abscisic acid responsiveness
	ABRE	Arabidopsis thaliana		151	5	+	ACGTG	cis-acting element involved in the abscisic acid responsiveness
	ABRE	Arabidopsis thaliana		639	5	-	ACGTG	cis-acting element involved in the abscisic acid responsiveness
	ABRE	Arabidopsis thaliana		699	5	-	ACGTG	cis-acting element involved in the abscisic acid responsiveness
	ABRE	Arabidopsis thaliana		744	5	-	ACGTG	cis-acting element involved in the abscisic acid responsiveness
	ABRE	Oryza sativa		782	9	+	GCCGCGTGGC	cis-acting element involved in the abscisic acid responsiveness
	ABRE	Arabidopsis thaliana		861	5	-	ACGTG	cis-acting element involved in the abscisic acid responsiveness
ZmAGO1f	W box	Arabidopsis thaliana	chr5:64763204…64761704	1462	6	-	TTGACC
	ACE	Petroselinum crispum		475	9	+	GCGACGTACC	cis-acting element involved in light responsiveness
	MYB-like sequence	Arabidopsis thaliana		1255	6	-	TAACCA
	CAT-box	Arabidopsis thaliana		1287	6	+	GCCACT	cis-acting regulatory element related to meristem expression
	AT~TATA-box	Arabidopsis thaliana		105	6	+	TATATA
	DRE core	Arabidopsis thaliana		538	6	-	GCCGAC
	DRE core	Arabidopsis thaliana		554	6	-	GCCGAC
	DRE core	Arabidopsis thaliana		671	6	-	GCCGAC
	STRE	Arabidopsis thaliana		602	5	+	AGGGG
	STRE	Arabidopsis thaliana		799	5	-	AGGGG
	STRE	Arabidopsis thaliana		1141	5	+	AGGGG
	STRE	Arabidopsis thaliana		1369	5	-	AGGGG
	STRE	Arabidopsis thaliana		1452	5	+	AGGGG
	TC-rich repeats	Nicotiana tabacum		829	9	+	ATTCTCTAAC	cis-acting element involved in defense and stress responsiveness
	AAGAA-motif	Avena sativa		690	7	+	GAAAGAA
	P-box	Oryza sativa		261	7	-	CCTTTTG	gibberellin-responsive element
	Box 4	Petroselinum crispum		24	6	+	ATTAAT	part of a conserved DNA module involved in light responsiveness
	Box 4	Petroselinum crispum		49	6	+	ATTAAT	part of a conserved DNA module involved in light responsiveness
	MYB recognition site	Arabidopsis thaliana		533	6	-	CCGTTG
	MYB recognition site	Arabidopsis thaliana		549	6	-	CCGTTG
	MYB recognition site	Arabidopsis thaliana		591	6	-	CCGTTG
	MYB recognition site	Arabidopsis thaliana		666	6	-	CCGTTG
	MYB recognition site	Arabidopsis thaliana		763	6	-	CCGTTG
	MYB recognition site	Arabidopsis thaliana		1163	6	+	CCGTTG
	circadian	Lycopersicon esculentum		119	9	-	CAAAGATATC	cis-acting regulatory element involved in circadian control
	Myb	Arabidopsis thaliana		682	6	-	TAACTG
	TCCC-motif	Spinacia oleracea		1041	7	-	TCTCCCT	part of a light responsive element
	G-Box	Pisum sativum		578	6	+	CACGTG	cis-acting regulatory element involved in light responsiveness
	G-Box	Pisum sativum		1178	6	-	CACGTT	cis-acting regulatory element involved in light responsiveness
	CARE	Oryza sativa		988	8	-	CAACTCAC
	G-box	Brassica napus		577	9	+	ACACGTGGC	cis-acting regulatory element involved in light responsiveness
	G-box	Arabidopsis thaliana		578	6	+	CACGTG	cis-acting regulatory element involved in light responsiveness
	CCAAT-box	Hordeum vulgare		533	6	+	CAACGG	MYBHv1 binding site
	CCAAT-box	Hordeum vulgare		549	6	+	CAACGG	MYBHv1 binding site
	CCAAT-box	Hordeum vulgare		591	6	+	CAACGG	MYBHv1 binding site
	CCAAT-box	Hordeum vulgare		666	6	+	CAACGG	MYBHv1 binding site
	CCAAT-box	Hordeum vulgare		763	6	+	CAACGG	MYBHv1 binding site
	CCAAT-box	Hordeum vulgare		1163	6	-	CAACGG	MYBHv1 binding site
	ARE	Zea mays		1221	6	+	AAACCA	cis-acting regulatory element essential for the anaerobic induction
	MYB	Arabidopsis thaliana		648	6	+	CAACAG
	MYB	Arabidopsis thaliana		1255	6	-	TAACCA
	MSA-like	Catharanthus roseus		589	8.5	+	(T/C)C(T/C)AACGG(T/C)(T/C)A	cis-acting element involved in cell cycle regulation
	MYC	Arabidopsis thaliana		55	6	+	CAATTG
	MYC	Arabidopsis thaliana		99	6	+	CATTTG
	MYC	Arabidopsis thaliana		1385	6	-	CAATTG
	ABRE	Hordeum vulgare		576	9	-	GCAACGTGTC	cis-acting element involved in the abscisic acid responsiveness
	ABRE	Arabidopsis thaliana		578	6	+	CACGTG	cis-acting element involved in the abscisic acid responsiveness
	ABRE	Arabidopsis thaliana		579	5	+	ACGTG	cis-acting element involved in the abscisic acid responsiveness
	ABRE	Oryza sativa		721	9	-	GCCGCGTGGC	cis-acting element involved in the abscisic acid responsiveness
	ABRE	Arabidopsis thaliana		1179	5	+	ACGTG	cis-acting element involved in the abscisic acid responsiveness
	Myb-binding site	Nicotiana tabacum		648	6	+	CAACAG
ZmAGO2a	CGTCA-motif	Hordeum vulgare	chr2:9977799…9979299	97	5	-	CGTCA	cis-acting regulatory element involved in the MeJA-responsiveness
	CGTCA-motif	Hordeum vulgare		241	5	+	CGTCA	cis-acting regulatory element involved in the MeJA-responsiveness
	CGTCA-motif	Hordeum vulgare		742	5	-	CGTCA	cis-acting regulatory element involved in the MeJA-responsiveness
	CGTCA-motif	Hordeum vulgare		1135	5	+	CGTCA	cis-acting regulatory element involved in the MeJA-responsiveness
	Sp1	Oryza sativa		1349	6	-	GGGCGG	light responsive element
	CAT-box	Arabidopsis thaliana		732	6	+	GCCACT	cis-acting regulatory element related to meristem expression
	as-1	Arabidopsis thaliana		97	5	+	TGACG
	as-1	Arabidopsis thaliana		241	5	-	TGACG
	as-1	Arabidopsis thaliana		742	5	+	TGACG
	as-1	Arabidopsis thaliana		1135	5	-	TGACG
	dOCT	Zea mays		1325	8	+	CTCGGATC	Meristem specific activation
	AT~TATA-box	Arabidopsis thaliana		1472	6	-	TATATA
	STRE	Arabidopsis thaliana		781	5	+	AGGGG
	TCA	Pisum sativum		290	9	-	TCATCTTCAT
	TCA	Pisum sativum		1482	9	-	TCATCTTCAT
	Myb	Arabidopsis thaliana		714	6	+	TAACTG
	TGACG-motif	Hordeum vulgare		97	5	+	TGACG	cis-acting regulatory element involved in the MeJA-responsiveness
	TGACG-motif	Hordeum vulgare		241	5	-	TGACG	cis-acting regulatory element involved in the MeJA-responsiveness
	TGACG-motif	Hordeum vulgare		742	5	+	TGACG	cis-acting regulatory element involved in the MeJA-responsiveness
	TGACG-motif	Hordeum vulgare		1135	5	-	TGACG	cis-acting regulatory element involved in the MeJA-responsiveness
	box S	Arabidopsis thaliana		245	7	+	AGCCACC
	G-Box	Pisum sativum		566	6	+	CACGTG	cis-acting regulatory element involved in light responsiveness
	GATA-motif	Arabidopsis thaliana		270	10	+	AAGATAAGATT	part of a light responsive element
	G-box	Zea mays		98	6	-	CACGTC	cis-acting regulatory element involved in light responsiveness
	G-box	Zea mays		559	6	+	CACGAC	cis-acting regulatory element involved in light responsiveness
	G-box	Arabidopsis thaliana		566	6	+	CACGTG	cis-acting regulatory element involved in light responsiveness
	O2-site	Zea mays		95	9	+	GATGATGTGG	cis-acting regulatory element involved in zein metabolism regulation
	WRE3	Pisum sativum		414	6	-	CCACCT
	WRE3	Pisum sativum		500	6	+	CCACCT
	ARE	Zea mays		150	6	-	AAACCA	cis-acting regulatory element essential for the anaerobic induction
	ARE	Zea mays		497	6	+	AAACCA	cis-acting regulatory element essential for the anaerobic induction
	ARE	Zea mays		769	6	-	AAACCA	cis-acting regulatory element essential for the anaerobic induction
	MYB	Arabidopsis thaliana		542	6	-	CAACAG
	MYB	Arabidopsis thaliana		894	6	-	CAACCA
	LTR	Hordeum vulgare		205	6	-	CCGAAA	cis-acting element involved in low-temperature responsiveness
	LTR	Hordeum vulgare		1240	6	+	CCGAAA	cis-acting element involved in low-temperature responsiveness
	chs-CMA2a	Petroselinum crispum		1205	8	-	TCACTTGA	part of a light responsive element
	MYC	Arabidopsis thaliana		1055	6	-	CAATTG
	Myb-binding site	Nicotiana tabacum		542	6	-	CAACAG
	ABRE	Arabidopsis thaliana		99	5	+	ACGTG	cis-acting element involved in the abscisic acid responsiveness
	ABRE	Arabidopsis thaliana		566	6	+	CACGTG	cis-acting element involved in the abscisic acid responsiveness
	ABRE	Arabidopsis thaliana
ZmAGO2b	CGTCA-motif	Hordeum vulgare	chr10:142397910…142396410	146	5	-	CGTCA	cis-acting regulatory element involved in the MeJA-responsiveness
	CGTCA-motif	Hordeum vulgare		495	5	-	CGTCA	cis-acting regulatory element involved in the MeJA-responsiveness
	CGTCA-motif	Hordeum vulgare		844	5	+	CGTCA	cis-acting regulatory element involved in the MeJA-responsiveness
	CGTCA-motif	Hordeum vulgare		904	5	+	CGTCA	cis-acting regulatory element involved in the MeJA-responsiveness
	CGTCA-motif	Hordeum vulgare		1169	5	-	CGTCA	cis-acting regulatory element involved in the MeJA-responsiveness
	CCGTCC-box	Petroselinum hortense		685	6	+	CCGTCC
	CCGTCC-box	Petroselinum hortense		1112	6	-	CCGTCC
	CAT-box	Arabidopsis thaliana		46	6	+	GCCACT	cis-acting regulatory element related to meristem expression
	CAT-box	Arabidopsis thaliana		88	6	-	GCCACT	cis-acting regulatory element related to meristem expression
	CAT-box	Arabidopsis thaliana		115	6	+	GCCACT	cis-acting regulatory element related to meristem expression
	CAT-box	Arabidopsis thaliana		361	6	-	GCCACT	cis-acting regulatory element related to meristem expression
	as-1	Arabidopsis thaliana		146	5	+	TGACG
	as-1	Arabidopsis thaliana		495	5	+	TGACG
	as-1	Arabidopsis thaliana		844	5	-	TGACG
	as-1	Arabidopsis thaliana		904	5	-	TGACG
	as-1	Arabidopsis thaliana		1169	5	+	TGACG
	DRE core	Arabidopsis thaliana		60	6	+	GCCGAC
	DRE core	Arabidopsis thaliana		227	6	-	GCCGAC
	DRE core	Arabidopsis thaliana		1141	6	+	GCCGAC
	TCA	Pisum sativum		1057	9	-	TCATCTTCAT
	TGACG-motif	Hordeum vulgare		146	5	+	TGACG	cis-acting regulatory element involved in the MeJA-responsiveness
	TGACG-motif	Hordeum vulgare		495	5	+	TGACG	cis-acting regulatory element involved in the MeJA-responsiveness
	TGACG-motif	Hordeum vulgare		844	5	-	TGACG	cis-acting regulatory element involved in the MeJA-responsiveness
	TGACG-motif	Hordeum vulgare		904	5	-	TGACG	cis-acting regulatory element involved in the MeJA-responsiveness
	TGACG-motif	Hordeum vulgare		1169	5	+	TGACG	cis-acting regulatory element involved in the MeJA-responsiveness
	WRE3	Pisum sativum		1190	6	-	CCACCT
	CCAAT-box	Hordeum vulgare		305	6	+	CAACGG	MYBHv1 binding site
	Sp1	Oryza sativa		102	6	-	GGGCGG	light responsive element
	Sp1	Oryza sativa		614	6	-	GGGCGG	light responsive element
	STRE	Arabidopsis thaliana		727	5	+	AGGGG
	STRE	Arabidopsis thaliana		747	5	-	AGGGG
	STRE	Arabidopsis thaliana		769	5	+	AGGGG
	MYB recognition site	Arabidopsis thaliana		305	6	-	CCGTTG
	Myb	Arabidopsis thaliana		874	6	+	CAACTG
	Myb	Arabidopsis thaliana		1325	6	+	CAACTG
	box S	Arabidopsis thaliana		677	7	+	AGCCACC
	G-box	Zea mays		887	6	+	CACGTC	cis-acting regulatory element involved in light responsiveness
	CCGTCC motif	Nicotiana tabacum		685	6	+	CCGTCC
	CCGTCC motif	Nicotiana tabacum		1112	6	-	CCGTCC
	ARE	Zea mays		275	6	+	AAACCA	cis-acting regulatory element essential for the anaerobic induction
	ARE	Zea mays		284	6	+	AAACCA	cis-acting regulatory element essential for the anaerobic induction
	ARE	Zea mays		710	6	-	AAACCA	cis-acting regulatory element essential for the anaerobic induction
	MYB	Arabidopsis thaliana		460	6	+	CAACCA
	MYB	Arabidopsis thaliana		1234	6	-	CAACAG
	LTR	Hordeum vulgare		1151	6	-	CCGAAA	cis-acting element involved in low-temperature responsiveness
	Myc	Arabidopsis thaliana		1247	7	-	TCTCTTA
	MBS	Arabidopsis thaliana		874	6	+	CAACTG	MYB binding site involved in drought-inducibility
	MBS	Arabidopsis thaliana		1325	6	+	CAACTG	MYB binding site involved in drought-inducibility
	GC-motif	Zea mays		682	6	+	CCCCCG	enhancer-like element involved in anoxic specific inducibility
	TCA-element	Nicotiana tabacum		812	9	+	CCATCTTTTT	cis-acting element involved in salicylic acid responsiveness
	TGA-element	Brassica oleracea		28	6	-	AACGAC	auxin-responsive element
	TGA-element	Brassica oleracea		254	6	-	AACGAC	auxin-responsive element
	ABRE	Hordeum vulgare		127	9	+	CGCACGTGTC	cis-acting element involved in the abscisic acid responsiveness
	ABRE	Arabidopsis thaliana		887	5	-	ACGTG	cis-acting element involved in the abscisic acid responsiveness
	Myb-binding site	Nicotiana tabacum		1234	6	-	CAACAG
ZmAGO4	CGTCA-motif	Hordeum vulgare	chr8:2518870…2520370	828	5	+	CGTCA	cis-acting regulatory element involved in the MeJA-responsiveness
	CGTCA-motif	Hordeum vulgare		833	5	+	CGTCA	cis-acting regulatory element involved in the MeJA-responsiveness
	WUN-motif	Nicotiana glutinosa		563	9	+	TAATTACTC
	CAT-box	Arabidopsis thaliana		1490	6	+	GCCACT	cis-acting regulatory element related to meristem expression
	as-1	Arabidopsis thaliana		828	5	-	TGACG
	as-1	Arabidopsis thaliana		833	5	-	TGACG
	AT~TATA-box	Arabidopsis thaliana		526	6	+	TATATA
	DRE core	Arabidopsis thaliana		25	6	+	GCCGAC
	DRE core	Arabidopsis thaliana		1390	6	-	GCCGAC
	STRE	Arabidopsis thaliana		685	5	+	AGGGG
	STRE	Arabidopsis thaliana		719	5	+	AGGGG
	STRE	Arabidopsis thaliana		734	5	-	AGGGG
	STRE	Arabidopsis thaliana		1148	5	+	AGGGG
	STRE	Arabidopsis thaliana		1442	5	-	AGGGG
	L-box	Petroselinum crispum		754	10	-	ATCCCACCTAC	part of a light responsive element
	MYB recognition site	Arabidopsis thaliana		792	6	-	CCGTTG
	circadian	Lycopersicon esculentum		138	9	+	CAAAGATATC	cis-acting regulatory element involved in circadian control
	circadian	Lycopersicon esculentum		1025	9	-	CAAAGATATC	cis-acting regulatory element involved in circadian control
	TGACG-motif	Hordeum vulgare		828	5	-	TGACG	cis-acting regulatory element involved in the MeJA-responsiveness
	TGACG-motif	Hordeum vulgare		833	5	-	TGACG	cis-acting regulatory element involved in the MeJA-responsiveness
	CARE	Oryza sativa		267	8	+	CAACTCAC
	G-box	Zea mays		831	6	+	CACGTC	cis-acting regulatory element involved in light responsiveness
	O2-site	Zea mays		830	9	-	GTTGACGTGA	cis-acting regulatory element involved in zein metabolism regulation
	WRE3	Pisum sativum		756	6	-	CCACCT
	MRE	Petroselinum crispum		1191	7	+	AACCTAA	MYB binding site involved in light responsiveness
	CCAAT-box	Hordeum vulgare		792	6	+	CAACGG	MYBHv1 binding site
	MYB	Arabidopsis thaliana		540	6	+	CAACCA
	GA-motif	Arabidopsis thaliana		120	8	+	ATAGATAA	part of a light responsive element
	TCA-element	Brassica oleracea		374	9	+	TCAGAAGAGG	cis-acting element involved in salicylic acid responsiveness
	MYC	Arabidopsis thaliana		5	6	+	CAATTG
	MYC	Arabidopsis thaliana		33	6	-	CATGTG
	MYC	Arabidopsis thaliana		1122	6	+	CATGTG
	TCT-motif	Arabidopsis thaliana		107	6	+	TCTTAC	part of a light responsive element
	TCT-motif	Arabidopsis thaliana		997	6	+	TCTTAC	part of a light responsive element
	TCT-motif	Arabidopsis thaliana		1198	6	-	TCTTAC	part of a light responsive element
	ABRE	Arabidopsis thaliana		831	5	-	ACGTG	cis-acting element involved in the abscisic acid responsiveness
ZmAGO5a	MYB-like sequence	Arabidopsis thaliana	chr2:232722126…232723626	928	6	+	TAACCA
	MYB-like sequence	Arabidopsis thaliana		1456	6	+	TAACCA
	CGTCA-motif	Hordeum vulgare		37	5	+	CGTCA	cis-acting regulatory element involved in the MeJA-responsiveness
	CGTCA-motif	Hordeum vulgare		811	5	+	CGTCA	cis-acting regulatory element involved in the MeJA-responsiveness
	CGTCA-motif	Hordeum vulgare		1437	5	+	CGTCA	cis-acting regulatory element involved in the MeJA-responsiveness
	Sp1	Oryza sativa		271	6	-	GGGCGG	light responsive element
	CAT-box	Arabidopsis thaliana		1489	6	+	GCCACT	cis-acting regulatory element related to meristem expression
	as-1	Arabidopsis thaliana		37	5	-	TGACG
	as-1	Arabidopsis thaliana		811	5	-	TGACG
	as-1	Arabidopsis thaliana		1437	5	-	TGACG
	motif I	Oryza sativa		668	10	+	gGTACGTGGCG	cis-acting regulatory element root specific
	DRE core	Arabidopsis thaliana		1238	6	+	GCCGAC
	STRE	Arabidopsis thaliana		120	5	+	AGGGG
	STRE	Arabidopsis thaliana		183	5	+	AGGGG
	STRE	Arabidopsis thaliana		258	5	+	AGGGG
	STRE	Arabidopsis thaliana		331	5	+	AGGGG
	STRE	Arabidopsis thaliana		394	5	+	AGGGG
	STRE	Arabidopsis thaliana		527	5	+	AGGGG
	STRE	Arabidopsis thaliana		684	5	-	AGGGG
	STRE	Arabidopsis thaliana		711	5	+	AGGGG
	STRE	Arabidopsis thaliana		1011	5	-	AGGGG
	STRE	Arabidopsis thaliana		1096	5	+	AGGGG
	STRE	Arabidopsis thaliana		1270	5	-	AGGGG
	STRE	Arabidopsis thaliana		1364	5	+	AGGGG
	TGACG-motif	Hordeum vulgare		37	5	-	TGACG	cis-acting regulatory element involved in the MeJA-responsiveness
	TGACG-motif	Hordeum vulgare		811	5	-	TGACG	cis-acting regulatory element involved in the MeJA-responsiveness
	TGACG-motif	Hordeum vulgare		1437	5	-	TGACG	cis-acting regulatory element involved in the MeJA-responsiveness
	G-box	Zea mays		53	6	+	CACGTC	cis-acting regulatory element involved in light responsiveness
	WRE3	Pisum sativum		1381	6	-	CCACCT
	DRE1	Zea mays		995	7	+	ACCGAGA
	MYB	Arabidopsis thaliana		105	6	+	CAACAG
	MYB	Arabidopsis thaliana		214	6	+	CAACAG
	MYB	Arabidopsis thaliana		928	6	+	TAACCA
	MYB	Arabidopsis thaliana		1456	6	+	TAACCA
	LTR	Hordeum vulgare		129	6	+	CCGAAA	cis-acting element involved in low-temperature responsiveness
	GC-motif	Zea mays		947	6	-	CCCCCG	enhancer-like element involved in anoxic specific inducibility
	GC-motif	Zea mays		960	6	-	CCCCCG	enhancer-like element involved in anoxic specific inducibility
	GC-motif	Zea mays		1070	6	-	CCCCCG	enhancer-like element involved in anoxic specific inducibility
	GC-motif	Zea mays		1412	6	+	CCCCCG	enhancer-like element involved in anoxic specific inducibility
	TGA-element	Brassica oleracea		879	6	+	AACGAC	auxin-responsive element
	Myb-binding site	Nicotiana tabacum		105	6	+	CAACAG
	Myb-binding site	Nicotiana tabacum		214	6	+	CAACAG
	ABRE	Arabidopsis thaliana		53	5	-	ACGTG	cis-acting element involved in the abscisic acid responsiveness
ZmAGO5b	CGTCA-motif	Hordeum vulgare	chr5:4000995…3999495	859	5	-	CGTCA	cis-acting regulatory element involved in the MeJA-responsiveness
	CGTCA-motif	Hordeum vulgare		1340	5	+	CGTCA	cis-acting regulatory element involved in the MeJA-responsiveness
	CCGTCC-box	Petroselinum hortense		415	6	+	CCGTCC
	CCGTCC-box	Petroselinum hortense		1054	6	-	CCGTCC
	as-1	Arabidopsis thaliana		859	5	+	TGACG
	as-1	Arabidopsis thaliana		1340	5	-	TGACG
	A-box	Petroselinum crispum		415	6	+	CCGTCC	cis-acting regulatory element
	A-box	Petroselinum crispum		1054	6	-	CCGTCC	cis-acting regulatory element
	ABRE3a	Zea mays		1197	6	+	TACGTG
	DRE core	Arabidopsis thaliana		950	6	-	GCCGAC
	DRE core	Arabidopsis thaliana		1088	6	-	GCCGAC
	DRE core	Arabidopsis thaliana		1136	6	-	GCCGAC
	STRE	Arabidopsis thaliana		56	5	+	AGGGG
	STRE	Arabidopsis thaliana		1050	5	+	AGGGG
	STRE	Arabidopsis thaliana		1404	5	+	AGGGG
	AAGAA-motif	Avena sativa		530	7	+	GAAAGAA
	AAGAA-motif	Avena sativa		723	7	-	GAAAGAA
	MYB recognition site	Arabidopsis thaliana		1221	6	+	CCGTTG
	TCCC-motif	Spinacia oleracea		1348	7	+	TCTCCCT	part of a light responsive element
	TGACG-motif	Hordeum vulgare		859	5	+	TGACG	cis-acting regulatory element involved in the MeJA-responsiveness
	TGACG-motif	Hordeum vulgare		1340	5	-	TGACG	cis-acting regulatory element involved in the MeJA-responsiveness
	G-box	Zea mays		1103	6	+	CACGTC	cis-acting regulatory element involved in light responsiveness
	G-box	Arabidopsis thaliana		1170	9	-	GCCACGTGGA	cis-acting regulatory element involved in light responsiveness
	G-box	Zea mays		1172	6	+	CACGTC	cis-acting regulatory element involved in light responsiveness
	G-box	Arabidopsis thaliana		1197	6	+	TACGTG	cis-acting regulatory element involved in light responsiveness
	O2-site	Zea mays		391	9	-	GATGACATGG	cis-acting regulatory element involved in zein metabolism regulation
	GT1-motif	Arabidopsis thaliana		1062	6	-	GGTTAA	light responsive element
	CCGTCC motif	Nicotiana tabacum		415	6	+	CCGTCC
	CCGTCC motif	Nicotiana tabacum		1054	6	-	CCGTCC
	CCAAT-box	Hordeum vulgare		1221	6	-	CAACGG	MYBHv1 binding site
	LTR	Hordeum vulgare		298	6	-	CCGAAA	cis-acting element involved in low-temperature responsiveness
	ABRE4	Zea mays		1197	6	-	CACGTA
	MYC	Arabidopsis thaliana		440	6	-	CATGTG
	ABRE	Arabidopsis thaliana		223	7	-	AACCCGG	cis-acting element involved in the abscisic acid responsiveness
	ABRE	Arabidopsis thaliana		1103	5	-	ACGTG	cis-acting element involved in the abscisic acid responsiveness
	ABRE	Arabidopsis thaliana		1172	5	-	ACGTG	cis-acting element involved in the abscisic acid responsiveness
	ABRE	Arabidopsis thaliana		1198	5	+	ACGTG	cis-acting element involved in the abscisic acid responsiveness
ZmAGO5c	W box	Arabidopsis thaliana	chr7:72034869…72036369	144	6	-	TTGACC
	CAT-box	Arabidopsis thaliana		436	6	+	GCCACT	cis-acting regulatory element related to meristem expression
	AT1-motif	Solanum tuberosum		620	13	+	AATTATTTTTTATT	part of a light responsive module
	STRE	Arabidopsis thaliana		79	5	+	AGGGG
	STRE	Arabidopsis thaliana		271	5	+	AGGGG
	STRE	Arabidopsis thaliana		1280	5	-	AGGGG
	AAGAA-motif	Avena sativa		1435	9	-	gGTAAAGAAA
	P-box	Oryza sativa		700	7	-	CCTTTTG	gibberellin-responsive element
	GARE-motif	Brassica oleracea		465	7	-	TCTGTTG	gibberellin-responsive element
	AE-box	Arabidopsis thaliana		251	8	-	AGAAACAA	part of a module for light response
	AE-box	Arabidopsis thaliana		1158	8	+	AGAAACAA	part of a module for light response
	Box 4	Petroselinum crispum		752	6	-	ATTAAT	part of a conserved DNA module involved in light responsiveness
	GCN4_motif	Oryza sativa		856	7	-	TGAGTCA	cis-regulatory element involved in endosperm expression
	GTGGC-motif	Hordeum vulgare		1132	10	-	CAGCGTGTGGC	part of a light responsive element
	WRE3	Pisum sativum		310	6	+	CCACCT
	ARE	Zea mays		796	6	+	AAACCA	cis-acting regulatory element essential for the anaerobic induction
	MYB	Arabidopsis thaliana		465	6	+	CAACAG
	MYB	Arabidopsis thaliana		742	6	+	CAACCA
	MYB	Arabidopsis thaliana		746	6	+	CAACCA
	TGA-element	Brassica oleracea		13	6	+	AACGAC	auxin-responsive element
	TGA-element	Brassica oleracea		1099	6	+	AACGAC	auxin-responsive element
	MYC	Arabidopsis thaliana		681	6	+	CAATTG
	MYC	Arabidopsis thaliana		964	6	+	CATGTG
	MYC	Arabidopsis thaliana		1163	6	-	CAATTG
	MYC	Arabidopsis thaliana		1476	6	+	CATTTG
	Myb-binding site	Nicotiana tabacum		465	6	+	CAACAG
ZmAGO5d	W box	Arabidopsis thaliana	chr5:13600503…13599003	420	6	-	TTGACC
	ERE	Nicotiana glutinos		839	8	+	ATTTCATA
	CGTCA-motif	Hordeum vulgare		554	5	-	CGTCA	cis-acting regulatory element involved in the MeJA-responsiveness
	Gap-box	Arabidopsis thaliana		641	9	+	CAAATGAA(A/G)A	part of a light responsive element
	Gap-box	Arabidopsis thaliana		1385	9.5	+	CAAATGAA(A/G)A	part of a light responsive element
	Sp1	Oryza sativa		14	6	-	GGGCGG	light responsive element
	Sp1	Oryza sativa		143	6	-	GGGCGG	light responsive element
	WUN-motif	Nicotiana glutinosa		760	9	-	AAATTTCTT
	as-1	Arabidopsis thaliana		554	5	+	TGACG
	DRE core	Arabidopsis thaliana		67	6	+	GCCGAC
	AAGAA-motif	Avena sativa		800	7	+	GAAAGAA
	AAGAA-motif	Avena sativa		1303	7	+	GAAAGAA
	TCA	Pisum sativum		1151	9	-	TCATCTTCAT
	TCA	Pisum sativum		1154	9	-	TCATCTTCAT
	TCA	Pisum sativum		1157	9	-	TCATCTTCAT
	I-box	Larix laricina		135	9	+	GTATAAGGCC	part of a light responsive element
	I-box	Triticum aestivum		1116	8	+	AGATAAGG	part of a light responsive element
	Box 4	Petroselinum crispum		1233	6	-	ATTAAT	part of a conserved DNA module involved in light responsiveness
	TCCC-motif	Spinacia oleracea		1112	7	-	TCTCCCT	part of a light responsive element
	TGACG-motif	Hordeum vulgare		554	5	+	TGACG	cis-acting regulatory element involved in the MeJA-responsiveness
	GATA-motif	Arabidopsis thaliana		360	10	+	AAGATAAGATT	part of a light responsive element
	GATA-motif	Solanum tuberosum		895	9	+	AAGGATAAGG	part of a light responsive element
	GATA-motif	Solanum tuberosum		1287	9	-	AAGGATAAGG	part of a light responsive element
	CARE	Oryza sativa		44	8	-	CAACTCAC
	chs-CMA2a	Petroselinum crispum		703	8	-	TCACTTGA	part of a light responsive element
	chs-CMA2a	Petroselinum crispum		721	8	-	TCACTTGA	part of a light responsive element
	MYC	Arabidopsis thaliana		276	6	+	CATTTG
	MYC	Arabidopsis thaliana		299	6	-	CATGTG
	MYC	Arabidopsis thaliana		641	6	-	CATTTG
	MYC	Arabidopsis thaliana		1025	6	-	CATTTG
	MYC	Arabidopsis thaliana		1148	6	-	CATTTG
	MYC	Arabidopsis thaliana		1385	6	-	CATTTG
ZmAGO7	W box	Arabidopsis thaliana	chr1:75627918…75626418	1331	6	+	TTGACC
	ACE	Petroselinum crispum		468	9	+	GCGACGTACC	cis-acting element involved in light responsiveness
	ACE	Petroselinum crispum		1286	9	+	GCGACGTACC	cis-acting element involved in light responsiveness
	CGTCA-motif	Hordeum vulgare		132	5	+	CGTCA	cis-acting regulatory element involved in the MeJA-responsiveness
	CGTCA-motif	Hordeum vulgare		559	5	+	CGTCA	cis-acting regulatory element involved in the MeJA-responsiveness
	CGTCA-motif	Hordeum vulgare		637	5	-	CGTCA	cis-acting regulatory element involved in the MeJA-responsiveness
	CGTCA-motif	Hordeum vulgare		952	5	+	CGTCA	cis-acting regulatory element involved in the MeJA-responsiveness
	CGTCA-motif	Hordeum vulgare		1002	5	-	CGTCA	cis-acting regulatory element involved in the MeJA-responsiveness
	CGTCA-motif	Hordeum vulgare		1147	5	-	CGTCA	cis-acting regulatory element involved in the MeJA-responsiveness
	CGTCA-motif	Hordeum vulgare		1378	5	-	CGTCA	cis-acting regulatory element involved in the MeJA-responsiveness
	Sp1	Oryza sativa		345	6	-	GGGCGG	light responsive element
	Sp1	Oryza sativa		651	6	-	GGGCGG	light responsive element
	Sp1	Oryza sativa		778	6	+	GGGCGG	light responsive element
	Sp1	Oryza sativa		947	6	-	GGGCGG	light responsive element
	CAT-box	Arabidopsis thaliana		1060	6	+	GCCACT	cis-acting regulatory element related to meristem expression
	as-1	Arabidopsis thaliana		132	5	-	TGACG
	as-1	Arabidopsis thaliana		559	5	-	TGACG
	as-1	Arabidopsis thaliana		637	5	+	TGACG
	as-1	Arabidopsis thaliana		952	5	-	TGACG
	as-1	Arabidopsis thaliana		1002	5	+	TGACG
	as-1	Arabidopsis thaliana		1147	5	+	TGACG
	as-1	Arabidopsis thaliana		1378	5	+	TGACG
	DRE core	Arabidopsis thaliana		199	6	+	GCCGAC
	DRE core	Arabidopsis thaliana		410	6	+	GCCGAC
	DRE core	Arabidopsis thaliana		1337	6	-	GCCGAC
	STRE	Arabidopsis thaliana		475	5	-	AGGGG
	STRE	Arabidopsis thaliana		621	5	+	AGGGG
	STRE	Arabidopsis thaliana		1155	5	+	AGGGG
	STRE	Arabidopsis thaliana		1165	5	-	AGGGG
	STRE	Arabidopsis thaliana		1396	5	+	AGGGG
	STRE	Arabidopsis thaliana		1480	5	+	AGGGG
	TCA	Pisum sativum		639	9	-	TCATCTTCAT
	GARE-motif	Brassica oleracea		843	7	+	TCTGTTG	gibberellin-responsive element
	MYB recognition site	Arabidopsis thaliana		898	6	+	CCGTTG
	TGACG-motif	Hordeum vulgare		132	5	-	TGACG	cis-acting regulatory element involved in the MeJA-responsiveness
	TGACG-motif	Hordeum vulgare		559	5	-	TGACG	cis-acting regulatory element involved in the MeJA-responsiveness
	TGACG-motif	Hordeum vulgare		637	5	+	TGACG	cis-acting regulatory element involved in the MeJA-responsiveness
	TGACG-motif	Hordeum vulgare		952	5	-	TGACG	cis-acting regulatory element involved in the MeJA-responsiveness
	TGACG-motif	Hordeum vulgare		1002	5	+	TGACG	cis-acting regulatory element involved in the MeJA-responsiveness
	TGACG-motif	Hordeum vulgare		1147	5	+	TGACG	cis-acting regulatory element involved in the MeJA-responsiveness
	TGACG-motif	Hordeum vulgare		1378	5	+	TGACG	cis-acting regulatory element involved in the MeJA-responsiveness
	box S	Arabidopsis thaliana		964	7	-	AGCCACC
	G-Box	Pisum sativum		854	6	-	CACGTG	cis-acting regulatory element involved in light responsiveness
	G-Box	Pisum sativum		1076	6	+	CACGTT	cis-acting regulatory element involved in light responsiveness
	plant_AP-2-like	Oryza sativa		123	8	+	CGACCAGG
	G-box	Zea mays		596	6	-	CACGAC	cis-acting regulatory element involved in light responsiveness
	G-box	Arabidopsis thaliana		854	6	-	CACGTG	cis-acting regulatory element involved in light responsiveness
	G-box	Zea mays		910	6	-	CACGAC	cis-acting regulatory element involved in light responsiveness
	WRE3	Pisum sativum		714	6	+	CCACCT
	CCAAT-box	Hordeum vulgare		898	6	-	CAACGG	MYBHv1 binding site
	MYB	Arabidopsis thaliana		109	6	+	CAACAG
	MYB	Arabidopsis thaliana		844	6	-	CAACAG
	LTR	Hordeum vulgare		173	6	+	CCGAAA	cis-acting element involved in low-temperature responsiveness
	LTR	Hordeum vulgare		269	6	-	CCGAAA	cis-acting element involved in low-temperature responsiveness
	GC-motif	Oryza sativa		5	9	-	CGGCGCCCT
	GC-motif	Zea mays		1112	6	-	CCCCCG	enhancer-like element involved in anoxic specific inducibility
	GC-motif	Zea mays		1175	6	+	CCCCCG	enhancer-like element involved in anoxic specific inducibility
	GC-motif	Zea mays		1410	6	+	CCCCCG	enhancer-like element involved in anoxic specific inducibility
	GC-motif	Zea mays		1460	6	+	CCCCCG	enhancer-like element involved in anoxic specific inducibility
	MYC	Arabidopsis thaliana		521	6	+	CATGTG
	ABRE	Oryza sativa		414	9	-	GCCGCGTGGC	cis-acting element involved in the abscisic acid responsiveness
	ABRE	Arabidopsis thaliana		854	6	-	CACGTG	cis-acting element involved in the abscisic acid responsiveness
	ABRE	Arabidopsis thaliana		855	5	+	ACGTG	cis-acting element involved in the abscisic acid responsiveness
	ABRE	Arabidopsis thaliana		1076	5	-	ACGTG	cis-acting element involved in the abscisic acid responsiveness
	Myb-binding site	Nicotiana tabacum		109	6	+	CAACAG
	Myb-binding site	Nicotiana tabacum		844	6	-	CAACAG
ZmAGO9	MYB-like sequence	Arabidopsis thaliana	chr6:168442865…168444365	1036	6	+	TAACCA
	CGTCA-motif	Hordeum vulgare		22	5	+	CGTCA	cis-acting regulatory element involved in the MeJA-responsiveness
	CGTCA-motif	Hordeum vulgare		316	5	+	CGTCA	cis-acting regulatory element involved in the MeJA-responsiveness
	CGTCA-motif	Hordeum vulgare		333	5	+	CGTCA	cis-acting regulatory element involved in the MeJA-responsiveness
	CGTCA-motif	Hordeum vulgare		930	5	-	CGTCA	cis-acting regulatory element involved in the MeJA-responsiveness
	CAT-box	Arabidopsis thaliana		1144	6	-	GCCACT	cis-acting regulatory element related to meristem expression
	as-1	Arabidopsis thaliana		22	5	-	TGACG
	as-1	Arabidopsis thaliana		316	5	-	TGACG
	as-1	Arabidopsis thaliana		333	5	-	TGACG
	as-1	Arabidopsis thaliana		930	5	+	TGACG
	TCA	Pisum sativum		1288	9	+	TCATCTTCAT
	TGACG-motif	Hordeum vulgare		22	5	-	TGACG	cis-acting regulatory element involved in the MeJA-responsiveness
	TGACG-motif	Hordeum vulgare		316	5	-	TGACG	cis-acting regulatory element involved in the MeJA-responsiveness
	TGACG-motif	Hordeum vulgare		333	5	-	TGACG	cis-acting regulatory element involved in the MeJA-responsiveness
	TGACG-motif	Hordeum vulgare		930	5	+	TGACG	cis-acting regulatory element involved in the MeJA-responsiveness
	TATC-box	Oryza sativa		1366	7	+	TATCCCA	cis-acting element involved in gibberellin-responsiveness
	MYC	Arabidopsis thaliana		200	6	+	CATGTG
	MYC	Arabidopsis thaliana		835	6	-	CATGTG
	MYC	Arabidopsis thaliana		837	6	+	CATGTG
	MYC	Arabidopsis thaliana		1391	6	+	CATTTG
	W box	Arabidopsis thaliana		1068	6	-	TTGACC
	WUN-motif	Nicotiana glutinosa		877	9	-	TTATTACAT
	ABRE3a	Zea mays		304	6	-	TACGTG
	ABRE3a	Zea mays		922	6	+	TACGTG
	ABRE3a	Zea mays		979	6	-	TACGTG
	ABRE3a	Zea mays		1049	6	+	TACGTG
	ABRE3a	Zea mays		1265	6	-	TACGTG
	STRE	Arabidopsis thaliana		82	5	-	AGGGG
	STRE	Arabidopsis thaliana		88	5	-	AGGGG
	STRE	Arabidopsis thaliana		713	5	+	AGGGG
	STRE	Arabidopsis thaliana		742	5	+	AGGGG
	STRE	Arabidopsis thaliana		795	5	+	AGGGG
	Myb	Arabidopsis thaliana		937	6	-	TAACTG
	Myb	Arabidopsis thaliana		996	6	+	CAACTG
	G-Box	Pisum sativum		27	9	-	CACGTGAAA	cis-acting regulatory element involved in light responsiveness
	G-Box	Pisum sativum		30	6	+	CACGTG	cis-acting regulatory element involved in light responsiveness
	G-box	Arabidopsis thaliana		30	6	+	CACGTG	cis-acting regulatory element involved in light responsiveness
	G-box	Arabidopsis thaliana		304	6	-	TACGTG	cis-acting regulatory element involved in light responsiveness
	G-box	Arabidopsis thaliana		922	6	+	TACGTG	cis-acting regulatory element involved in light responsiveness
	G-box	Arabidopsis thaliana		979	6	-	TACGTG	cis-acting regulatory element involved in light responsiveness
	G-box	Arabidopsis thaliana		1049	6	+	TACGTG	cis-acting regulatory element involved in light responsiveness
	G-box	Zea mays		1134	6	+	CACGAC	cis-acting regulatory element involved in light responsiveness
	G-box	Arabidopsis thaliana		1265	6	-	TACGTG	cis-acting regulatory element involved in light responsiveness
	GT1-motif	Arabidopsis thaliana		500	6	+	GGTTAA	light responsive element
	MRE	Petroselinum crispum		497	7	-	AACCTAA	MYB binding site involved in light responsiveness
	ABRE4	Zea mays		304	6	+	CACGTA
	ABRE4	Zea mays		922	6	-	CACGTA
	ABRE4	Zea mays		979	6	+	CACGTA
	ABRE4	Zea mays		1049	6	-	CACGTA
	ABRE4	Zea mays		1265	6	+	CACGTA
	MYB	Arabidopsis thaliana		126	6	-	CAACCA
	MYB	Arabidopsis thaliana		585	6	-	CAACCA
	MYB	Arabidopsis thaliana		1036	6	+	TAACCA
	MBS	Arabidopsis thaliana		996	6	+	CAACTG	MYB binding site involved in drought-inducibility
	GC-motif	Zea mays		99	6	+	CCCCCG	enhancer-like element involved in anoxic specific inducibility
	TGA-element	Brassica oleracea		885	6	+	AACGAC	auxin-responsive element
	RY-element	Helianthus annuus		1087	8	-	CATGCATG	cis-acting regulatory element involved in seed-specific regulation
	RY-element	Helianthus annuus		1091	8	-	CATGCATG	cis-acting regulatory element involved in seed-specific regulation
	ABRE	Arabidopsis thaliana		30	6	+	CACGTG	cis-acting element involved in the abscisic acid responsiveness
	ABRE	Arabidopsis thaliana		31	5	+	ACGTG	cis-acting element involved in the abscisic acid responsiveness
	ABRE	Hordeum vulgare		302	9	-	CGTACGTGCA	cis-acting element involved in the abscisic acid responsiveness
	ABRE	Arabidopsis thaliana		304	5	-	ACGTG	cis-acting element involved in the abscisic acid responsiveness
	ABRE	Hordeum vulgare		920	9	+	CGTACGTGCA	cis-acting element involved in the abscisic acid responsiveness
	ABRE	Arabidopsis thaliana		923	5	+	ACGTG	cis-acting element involved in the abscisic acid responsiveness
	ABRE	Hordeum vulgare		977	10	-	CGTACGTGCA	cis-acting element involved in the abscisic acid responsiveness
	ABRE	Arabidopsis thaliana		979	5	-	ACGTG	cis-acting element involved in the abscisic acid responsiveness
	ABRE	Arabidopsis thaliana		1050	5	+	ACGTG	cis-acting element involved in the abscisic acid responsiveness
	ABRE	Arabidopsis thaliana		1265	5	-	ACGTG	cis-acting element involved in the abscisic acid responsiveness
ZmAGO10a	MYB-like sequence	Arabidopsis thaliana	chr9:86402098…86400598	1193	6	+	TAACCA
	WUN-motif	Nicotiana glutinosa		1289	9	-	CCATTTCAA
	CAT-box	Arabidopsis thaliana		723	6	-	GCCACT	cis-acting regulatory element related to meristem expression
	STRE	Arabidopsis thaliana		125	5	+	AGGGG
	P-box	Oryza sativa		235	7	-	CCTTTTG	gibberellin-responsive element
	GARE-motif	Brassica oleracea		982	7	+	TCTGTTG	gibberellin-responsive element
	Box 4	Petroselinum crispum		49	6	+	ATTAAT	part of a conserved DNA module involved in light responsiveness
	Myb	Arabidopsis thaliana		712	6	-	TAACTG
	box S	Arabidopsis thaliana		219	7	-	AGCCACC
	AP-1	Arabidopsis thaliana		138	8	+	TGAGTTAG
	GTGGC-motif	Arabidopsis thaliana		925	10	-	CATCGTGTGGC	part of a light responsive element
	GT1-motif	Avena sativa		1191	7	-	GGTTAAT	light responsive element
	GT1-motif	Arabidopsis thaliana		1192	6	-	GGTTAA	light responsive element
	ARE	Zea mays		272	6	-	AAACCA	cis-acting regulatory element essential for the anaerobic induction
	ARE	Zea mays		452	6	-	AAACCA	cis-acting regulatory element essential for the anaerobic induction
	ARE	Zea mays		1321	6	+	AAACCA	cis-acting regulatory element essential for the anaerobic induction
	MYB	Arabidopsis thaliana		1	6	+	CAACAG
	MYB	Arabidopsis thaliana		407	6	-	CAACCA
	MYB	Arabidopsis thaliana		524	6	+	CAACAG
	MYB	Arabidopsis thaliana		983	6	-	CAACAG
	MYB	Arabidopsis thaliana		1193	6	+	TAACCA
	MYB	Arabidopsis thaliana		1227	6	-	CAACCA
	TCA-element	Nicotiana tabacum		1010	10	-	CCATCTTTTT	cis-acting element involved in salicylic acid responsiveness
	MYC	Arabidopsis thaliana		288	6	+	CATGTG
	MYC	Arabidopsis thaliana		442	6	-	CATTTG
	MYC	Arabidopsis thaliana		1022	6	-	CATTTG
	MYC	Arabidopsis thaliana		1090	6	+	CATTTG
	TCT-motif	Arabidopsis thaliana		265	6	-	TCTTAC	part of a light responsive element
	TGA-element	Brassica oleracea		1037	6	+	AACGAC	auxin-responsive element
	Myb-binding site	Nicotiana tabacum		1	6	+	CAACAG
	Myb-binding site	Nicotiana tabacum		524	6	+	CAACAG
	Myb-binding site	Nicotiana tabacum		983	6	-	CAACAG
	ATCT-motif	Pisum sativum		79	9	-	AATCTAATCC	part of a conserved DNA module involved in light responsiveness
ZmAGO10b	ERE	Nicotiana glutinos	chr6:103128931…103130431	1239	8	-	ATTTCATA
	MYB-like sequence	Arabidopsis thaliana		749	6	+	TAACCA
	CGTCA-motif	Hordeum vulgare		160	5	-	CGTCA	cis-acting regulatory element involved in the MeJA-responsiveness
	CGTCA-motif	Hordeum vulgare		794	5	-	CGTCA	cis-acting regulatory element involved in the MeJA-responsiveness
	Gap-box	Arabidopsis thaliana		202	9	-	CAAATGAA(A/G)A	part of a light responsive element
	CAT-box	Arabidopsis thaliana		1364	6	+	GCCACT	cis-acting regulatory element related to meristem expression
	as-1	Arabidopsis thaliana		160	5	+	TGACG
	as-1	Arabidopsis thaliana		794	5	+	TGACG
	STRE	Arabidopsis thaliana		726	5	-	AGGGG
	TC-rich repeats	Nicotiana tabacum		310	9	-	GTTTTCTTAC	cis-acting element involved in defense and stress responsiveness
	AAGAA-motif	Avena sativa		517	7	+	GAAAGAA
	TCA	Pisum sativum		1410	9	-	TCATCTTCAT
	Box 4	Petroselinum crispum		885	6	-	ATTAAT	part of a conserved DNA module involved in light responsiveness
	HD-Zip 3	Arabidopsis thaliana		867	9.5	-	GTAAT(G/C)ATTAC	protein binding site
	Myb	Arabidopsis thaliana		254	6	-	TAACTG
	Myb	Arabidopsis thaliana		682	6	-	TAACTG
	Myb	Arabidopsis thaliana		1003	6	-	CAACTG
	Myb	Arabidopsis thaliana		1156	6	+	TAACTG
	Myb	Arabidopsis thaliana		1162	6	+	TAACTG
	TCCC-motif	Spinacia oleracea		20	7	-	TCTCCCT	part of a light responsive element
	TGACG-motif	Hordeum vulgare		160	5	+	TGACG	cis-acting regulatory element involved in the MeJA-responsiveness
	TGACG-motif	Hordeum vulgare		794	5	+	TGACG	cis-acting regulatory element involved in the MeJA-responsiveness
	G-Box	Pisum sativum		839	6	-	CACGTT	cis-acting regulatory element involved in light responsiveness
	GATA-motif	Solanum tuberosum		236	9	+	AAGGATAAGG	part of a light responsive element
	GATA-motif	Arabidopsis thaliana		545	7	-	GATAGGA	part of a light responsive element
	O2-site	Zea mays		284	9	+	GATGACATGG	cis-acting regulatory element involved in zein metabolism regulation
	GT1-motif	Avena sativa		1291	7	+	GGTTAAT	light responsive element
	ARE	Zea mays		776	6	-	AAACCA	cis-acting regulatory element essential for the anaerobic induction
	MYB	Arabidopsis thaliana		41	6	-	CAACCA
	MYB	Arabidopsis thaliana		743	6	-	CAACCA
	MYB	Arabidopsis thaliana		749	6	+	TAACCA
	LTR	Hordeum vulgare		72	6	+	CCGAAA	cis-acting element involved in low-temperature responsiveness
	LTR	Hordeum vulgare		1202	6	-	CCGAAA	cis-acting element involved in low-temperature responsiveness
	MBS	Arabidopsis thaliana		1003	6	-	CAACTG	MYB binding site involved in drought-inducibility
	TCA-element	Nicotiana tabacum		547	9	+	CCATCTTTTT	cis-acting element involved in salicylic acid responsiveness
	TCA-element	Nicotiana tabacum		1263	9	+	CCATCTTTTT	cis-acting element involved in salicylic acid responsiveness
	MYC	Arabidopsis thaliana		206	6	+	CATTTG
	MYC	Arabidopsis thaliana		273	6	-	CATGTG
	MYC	Arabidopsis thaliana		1386	6	-	CATTTG
	TCT-motif	Arabidopsis thaliana		310	6	-	TCTTAC	part of a light responsive element
	ABRE	Arabidopsis thaliana		840	5	+	ACGTG	cis-acting element involved in the abscisic acid responsiveness
ZmAGO18a	ACE	Petroselinum crispum	chr1:250071490…250069990	437	9	+	GACACGTATG	cis-acting element involved in light responsiveness
	CGTCA-motif	Hordeum vulgare		362	5	+	CGTCA	cis-acting regulatory element involved in the MeJA-responsiveness
	CGTCA-motif	Hordeum vulgare		445	5	-	CGTCA	cis-acting regulatory element involved in the MeJA-responsiveness
	CGTCA-motif	Hordeum vulgare		917	5	-	CGTCA	cis-acting regulatory element involved in the MeJA-responsiveness
	CGTCA-motif	Hordeum vulgare		1187	5	+	CGTCA	cis-acting regulatory element involved in the MeJA-responsiveness
	CCGTCC-box	Petroselinum hortense		1043	6	+	CCGTCC
	CCGTCC-box	Petroselinum hortense		1140	6	+	CCGTCC
	as-1	Arabidopsis thaliana		362	5	-	TGACG
	as-1	Arabidopsis thaliana		445	5	+	TGACG
	as-1	Arabidopsis thaliana		917	5	+	TGACG
	as-1	Arabidopsis thaliana		1187	5	-	TGACG
	A-box	Petroselinum crispum		1043	6	+	CCGTCC	cis-acting regulatory element
	A-box	Petroselinum crispum		1140	6	+	CCGTCC	cis-acting regulatory element
	STRE	Arabidopsis thaliana		600	5	-	AGGGG
	STRE	Arabidopsis thaliana		681	5	-	AGGGG
	STRE	Arabidopsis thaliana		1123	5	-	AGGGG
	AAGAA-motif	Avena sativa		417	9	-	gGTAAAGAAA
	P-box	Oryza sativa		591	7	+	CCTTTTG	gibberellin-responsive element
	P-box	Oryza sativa		839	7	-	CCTTTTG	gibberellin-responsive element
	I-box	Arabidopsis thaliana		1080	9	+	GATAAGGGT	part of a light responsive element
	Box 4	Petroselinum crispum		15	6	+	ATTAAT	part of a conserved DNA module involved in light responsiveness
	Box 4	Petroselinum crispum		289	6	+	ATTAAT	part of a conserved DNA module involved in light responsiveness
	Box 4	Petroselinum crispum		297	6	+	ATTAAT	part of a conserved DNA module involved in light responsiveness
	Box 4	Petroselinum crispum		1326	6	-	ATTAAT	part of a conserved DNA module involved in light responsiveness
	Myb	Arabidopsis thaliana		631	6	-	TAACTG
	TCCC-motif	Spinacia oleracea		587	7	+	TCTCCCT	part of a light responsive element
	TGACG-motif	Hordeum vulgare		362	5	-	TGACG	cis-acting regulatory element involved in the MeJA-responsiveness
	TGACG-motif	Hordeum vulgare		445	5	+	TGACG	cis-acting regulatory element involved in the MeJA-responsiveness
	TGACG-motif	Hordeum vulgare		917	5	+	TGACG	cis-acting regulatory element involved in the MeJA-responsiveness
	TGACG-motif	Hordeum vulgare		1187	5	-	TGACG	cis-acting regulatory element involved in the MeJA-responsiveness
	G-Box	Pisum sativum		439	6	+	CACGTG	cis-acting regulatory element involved in light responsiveness
	G-Box	Triticum aestivum		1469	10	-	TCCACATGGCA	cis-acting regulatory element involved in light responsiveness
	AuxRR-core	Nicotiana tabacum		862	7	+	GGTCCAT	cis-acting regulatory element involved in auxin responsiveness
	G-box	Brassica napus		438	8	+	ACACGTGT	cis-acting regulatory element involved in light responsiveness
	G-box	Arabidopsis thaliana		439	6	+	CACGTG	cis-acting regulatory element involved in light responsiveness
	G-box	Arabidopsis thaliana		1470	9	+	GCCACGTGGA	cis-acting regulatory element involved in light responsiveness
	CTAG-motif	Avena sativa		84	9	-	ACTAGCAGAA
	CTAG-motif	Avena sativa		381	9	+	ACTAGCAGAA
	LAMP-element	Pisum sativum		897	8	+	CTTTATCA	part of a light responsive element
	Myc	Arabidopsis thaliana		177	7	+	TCTCTTA
	MYC	Arabidopsis thaliana		661	6	+	CATTTG
	MYC	Arabidopsis thaliana		987	6	-	CATTTG
	MYC	Arabidopsis thaliana		1384	6	-	CATTTG
	MYC	Arabidopsis thaliana		1488	6	-	CATTTG
	MYC	Arabidopsis thaliana		1496	6	+	CATTTG
	ABRE	Hordeum vulgare		437	9	-	CGCACGTGTC	cis-acting element involved in the abscisic acid responsiveness
	ABRE	Arabidopsis thaliana		439	6	+	CACGTG	cis-acting element involved in the abscisic acid responsiveness
	ABRE	Arabidopsis thaliana		440	5	+	ACGTG	cis-acting element involved in the abscisic acid responsiveness
ZmAGO18b	MYB-like sequence	Arabidopsis thaliana	chr2:198854426…198852926	946	6	-	TAACCA
	re2f-1	Oryza sativa		809	8	+	GCGGGAAA
	CGTCA-motif	Hordeum vulgare		1225	5	-	CGTCA	cis-acting regulatory element involved in the MeJA-responsiveness
	CGTCA-motif	Hordeum vulgare		1232	5	+	CGTCA	cis-acting regulatory element involved in the MeJA-responsiveness
	CCGTCC-box	Petroselinum hortense		484	6	+	CCGTCC
	as-1	Arabidopsis thaliana		1225	5	+	TGACG
	as-1	Arabidopsis thaliana		1232	5	-	TGACG
	A-box	Petroselinum crispum		484	6	+	CCGTCC	cis-acting regulatory element
	TCA	Pisum sativum		637	9	-	TCATCTTCAT
	P-box	Oryza sativa		323	7	-	CCTTTTG	gibberellin-responsive element
	I-box	Zea mays		641	9	+	gGATAAGGTG	part of a light responsive element
	Box 4	Petroselinum crispum		998	6	-	ATTAAT	part of a conserved DNA module involved in light responsiveness
	TGACG-motif	Hordeum vulgare		1225	5	+	TGACG	cis-acting regulatory element involved in the MeJA-responsiveness
	TGACG-motif	Hordeum vulgare		1232	5	-	TGACG	cis-acting regulatory element involved in the MeJA-responsiveness
	WRE3	Pisum sativum		531	6	-	CCACCT
	WRE3	Pisum sativum		646	6	-	CCACCT
	CCAAT-box	Hordeum vulgare		1150	6	+	CAACGG	MYBHv1 binding site
	MYC	Arabidopsis thaliana		61	6	+	CAATTG
	MYC	Arabidopsis thaliana		870	6	-	CATGTG
	MYC	Arabidopsis thaliana		1310	6	-	CATTTG
	Sp1	Oryza sativa		1424	6	+	GGGCGG	light responsive element
	STRE	Arabidopsis thaliana		44	5	-	AGGGG
	STRE	Arabidopsis thaliana		311	5	+	AGGGG
	STRE	Arabidopsis thaliana		441	5	-	AGGGG
	STRE	Arabidopsis thaliana		620	5	+	AGGGG
	STRE	Arabidopsis thaliana		823	5	+	AGGGG
	STRE	Arabidopsis thaliana		854	5	+	AGGGG
	STRE	Arabidopsis thaliana		1269	5	+	AGGGG
	STRE	Arabidopsis thaliana		1384	5	+	AGGGG
	MYB recognition site	Arabidopsis thaliana		1150	6	-	CCGTTG
	GATA-motif	Solanum tuberosum		326	9	+	AAGGATAAGG	part of a light responsive element
	O2-site	Zea mays		642	9	+	GATGATGTGG	cis-acting regulatory element involved in zein metabolism regulation
	GT1-motif	Arabidopsis thaliana		947	6	+	GGTTAA	light responsive element
	GT1-motif	Arabidopsis thaliana		979	6	-	GGTTAA	light responsive element
	CCGTCC motif	Nicotiana tabacum		484	6	+	CCGTCC
	ARE	Zea mays		498	6	+	AAACCA	cis-acting regulatory element essential for the anaerobic induction
	ARE	Zea mays		899	6	+	AAACCA	cis-acting regulatory element essential for the anaerobic induction
	MYB	Arabidopsis thaliana		946	6	-	TAACCA
	MYB	Arabidopsis thaliana		1188	6	+	CAACCA
	GC-motif	Zea mays		1033	6	+	CCCCCG	enhancer-like element involved in anoxic specific inducibility
	TCA-element	Nicotiana tabacum		1158	9	-	CCATCTTTTT	cis-acting element involved in salicylic acid responsiveness
	TCA-element	Nicotiana tabacum		1416	9	-	CCATCTTTTT	cis-acting element involved in salicylic acid responsiveness
	chs-CMA2a	Petroselinum crispum		1353	8	-	TCACTTGA	part of a light responsive element
	TCT-motif	Arabidopsis thaliana		421	6	-	TCTTAC	part of a light responsive element
	TCT-motif	Arabidopsis thaliana		433	6	-	TCTTAC	part of a light responsive element
